# Supplementary material for: Structural mechanism for the selective phosphorylation of DNA-loaded MCM double hexamers by the Dbf4-dependent kinase
Source: PubMed Central journal article supplement (PMC8770131; doi:10.1038/s41594-021-00698-z), 2021-12-28
Supplement: 41594_2021_698_MOESM1_ESM.pdf [file 41594_2021_698_MOESM1_ESM.pdf]

**Supplementary information**

---

**Structural mechanism for the selective phosphorylation of DNA-loaded MCM double hexamers by the Dbf4-dependent kinase**

---

In the format provided by the authors and unedited

**Supplementary Table 1:** DDK-dependent phosphorylation of Mcm4 detected by mass spectrometry.

| Site             | Phosphorylated in Mcm2-7-Cdt1       | Localisation probability | PEP      | Phosphorylated in MCM double hexamer                     | Localisation probability | PEP      |
|------------------|-------------------------------------|--------------------------|----------|----------------------------------------------------------|--------------------------|----------|
| <b>S52</b>       | Yes                                 | 1.00                     | 0.00036  | Yes                                                      | 1.00                     | 5.87E-29 |
| <b>S56</b>       | Yes                                 | 1.00                     | 0.00036  | Yes                                                      | 1.00                     | 8.31E-20 |
| <b>S68/S69</b>   | No                                  | -                        | 2.55E-11 | Majority unmodified, but some phosphorylation detectable | 0.88                     | 1.07E-03 |
| <b>S75</b>       | No                                  | -                        | 2.55E-11 | Majority unmodified, but some phosphorylation detectable | 0.99                     | 1.07E-03 |
| <b>S76</b>       | No                                  | -                        | 2.55E-11 | Majority unmodified, but some phosphorylation detectable | 0.80                     | 1.07E-03 |
| <b>S77</b>       | No                                  | -                        | 2.55E-11 | Majority unmodified, but some phosphorylation detectable | 0.81                     | 1.38E-03 |
| <b>S82</b>       | No                                  | -                        | 4.57E-06 | Yes                                                      | 1.00                     | 2.84E-05 |
| <b>S87</b>       | No                                  | -                        | 4.57E-06 | Yes                                                      | 1.00                     | 3.17E-04 |
| <b>S108/S112</b> | Not detected                        |                          |          | Only phosphorylated peptide detected                     |                          | 0.044    |
| <b>S118</b>      | No                                  | -                        | 1.57E-04 | Yes                                                      | 1.00                     | 4.50E-03 |
| <b>T140</b>      | No                                  | -                        | 1.99E-20 | Yes                                                      | 1.00                     | 2.62E-08 |
| <b>S141</b>      | No                                  | -                        | 1.99E-20 | Yes                                                      | 1.00                     | 2.62E-08 |
| <b>S144</b>      | No                                  | -                        | 1.99E-20 | Yes                                                      | 1.00                     | 2.62E-08 |
| <b>S171</b>      | Only detected in sample without DDK |                          |          | Not detected                                             |                          |          |

**Supplementary Table 2:** DDK-dependent phosphorylation of Mcm6 detected by mass spectrometry.

| Site               | Phosphorylated in Mcm2-7-Cdt1 | Localisation probability | PEP      | Phosphorylated in MCM double hexamer | Localisation probability | PEP      |
|--------------------|-------------------------------|--------------------------|----------|--------------------------------------|--------------------------|----------|
| <b>T75</b>         | No                            | -                        | 3.34E-60 | Yes                                  | 1.00                     | 1.59E-23 |
| <b>S78</b>         | No                            | -                        | 3.34E-60 | Yes                                  | 1.00                     | 1.59E-23 |
| <b>S226</b>        | Yes                           | 0.96                     | 4.64E-48 | Yes                                  | 0.96                     | 8.83E-26 |
| <b>S232/234</b>    | Yes                           | 0.98                     | 8.07E-06 | Yes                                  | 0.72                     | 5.32E-10 |
| <b>S1016/S1017</b> | Yes                           | 0.57/0.5                 | 8.16E-14 | Yes                                  | 0.56/0.5                 | 1.35E-04 |

**Supplementary Table 3: Yeast strains.**

| Strain  | Genotype (all in W303 background)                                                                                                                                                                                                 | Reference             |
|---------|-----------------------------------------------------------------------------------------------------------------------------------------------------------------------------------------------------------------------------------|-----------------------|
| yAM33   | <i>MATa</i><br><i>bar1::Hyg</i><br><i>pep4::KanMx</i><br><i>his3::pRS303-Cdt1/Gal4 (HIS3)</i><br><i>ura3::pRS306-Mcm2/Mcm3 CBP-Mcm3 (URA3)</i><br><i>trp1::pRS304-Mcm4/5 (TRP1)</i><br><i>leu2::pRS305-Mcm6/7 (LEU2)</i>          | (Coster et al. 2014)  |
| yJG3    | <i>MATa ade2-1 ura3-1 his3-11,15 trp1-1 leu2-3,112 can1-100,</i><br><i>pep4::KanMX,</i><br><i>trp1::TRP1pRS304/CDC7, CBP-DBF4<sup>A119-219</sup></i>                                                                              | This study            |
| yJG13   | <i>MATa ade2-1 ura3-1 his3-11,15 trp1-1 leu2-3,112 can1-100,</i><br><i>pep4::KanMX,</i><br><i>trp1::TRP1pRS304/CDC7, CBP-DBF4<sup>T188D,S192D</sup></i>                                                                           | This study            |
| ySDK8   | <i>MATa ade2-1 ura3-1 his3-11,15 trp1-1 leu2-3,112 can1-100,</i><br><i>pep4::KanMX,</i><br><i>trp1::TRP1pRS304/CDC7, CBP-DBF4</i>                                                                                                 | (On et al. 2014)      |
| ySD-ORC | <i>MATa ade2-1 ura3-1 his3-11,15 trp1-1 leu2-3,112 can1-100</i><br><i>bar1::Hyg</i><br><i>pep4::KanMX</i><br><i>his3::pRS303-ORC3/4 (HIS3)</i><br><i>ura3::pRS306-ORC1/2 CBP-Orc1 (URA3)</i><br><i>trp1::pRS304-ORC5/6 (TRP1)</i> | (Frigola et al. 2013) |

**Supplementary Table 4: DNA plasmids.**

| Plasmid | Construct                                       | Reference                  |
|---------|-------------------------------------------------|----------------------------|
| pAM3    | pGEX-6p-1-CDC6                                  | (Frigola et al. 2013)      |
|         | pET21b-RAD53                                    | (Gilbert et al. 2001)      |
| pAWM7   | pET21b-RAD53 <sup>K227A,D339A</sup> -6xHis      | (McClure and Diffley 2021) |
| pJG1    | pRS304-CDC7-GAL-CBP-DBF4 <sup>A119-219</sup>    | This study                 |
| pJG9    | pRS304-CDC7-GAL-CBP-DBF4 <sup>T188D,S192D</sup> | This study                 |
