# Supplementary material for: Structural mechanism for the selective phosphorylation of DNA-loaded MCM double hexamers by the Dbf4-dependent kinase
Source: PubMed Central journal article supplement (PMC8770131; doi:10.1038/s41594-021-00698-z), 2021-12-28

## Source data

**Figure 3c**

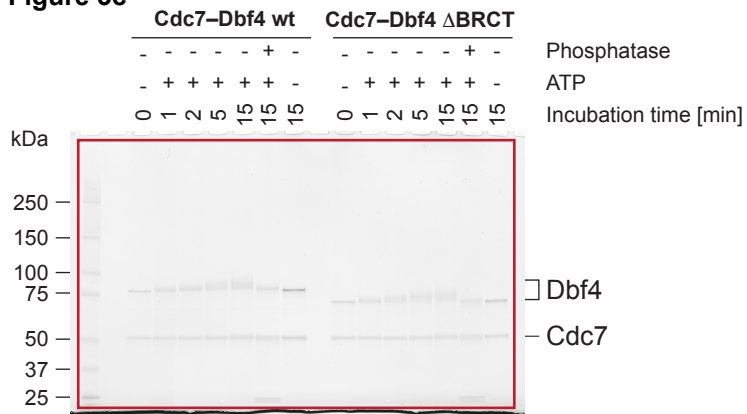

**Figure 3d**

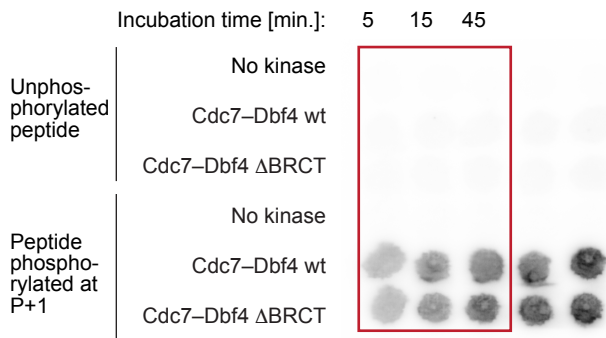

Supplement: 41594_2021_698_MOESM5_ESM.pdf [file 41594_2021_698_MOESM5_ESM.pdf]
